# Supplementary material
Source: publisher site journal article supplement (https://www.dovepress.com/get_supplementary_file.php?f=+296000.docx)
Supplement: Supplementary file 1 [file get_supplementary_file.php]

**Supplementary Table 1:**

**Biofilm forming ability of both infectious and colonizing isolates**

| **Isolate**  **Code** | **Isolate**  **Type** | **Average**  **OD** | **Median**  **OD** | **Biofilm formation**  **ability** | **Isolate**  **Code** | **Isolate**  **Type** | **Average**  **OD** | **Median**  **OD** | **Biofilm formation**  **ability** |
| --- | --- | --- | --- | --- | --- | --- | --- | --- | --- |
| **1** | IF | 0.03 | 0.03 | W | **26** | IF | 0.17 | 0.174 | M |
| **2** | C | 0.22 | 0.158 | M | **27** | IF | 0.11 | 0.091 | M |
| **3** | IF | 0.27 | 0.295 | M | **28** | C | 0.06 | 0.057 | W |
| **4** | C | 0.07 | 0.045 | W | **29** | IF | 0.20 | 0.2005 | M |
| **5** | IF | 0.16 | 0.134 | M | **30** | IF | 0.58 | 0.5835 | S |
| **6** | IF | 0.25 | 0.259 | W | **31** | IF | 0.27 | 0.263 | S |
| **7** | IF | 0.09 | 0.097 | W | **32** | IF | 0.33 | 0.36 | S |
| **8** | C | 0.09 | 0.079 | W | **33** | IF | 0.17 | 0.175 | M |
| **9** | IF | 0.05 | 0.051 | W | **34** | IF | 0.12 | 0.117 | M |
| **10** | C | 0.11 | 0.108 | W | **35** | IF | 0.19 | 0.231 | M |
| **11** | C | 0.10 | 0.114 | W | **36** | IF | 0.27 | 0.27 | S |
| **12** | IF | 0.05 | 0.048 | W | **37** | IF | 0.23 | 0.237 | S |
| **13** | IF | 0.14 | 0.1435 | M | **38** | IF | 0.15 | 0.14 | M |
| **14** | C | 0.07 | 0.071 | W | **39** | IF | 0.14 | 0.15 | M |
| **15** | C | 0.09 | 0.0905 | W | **40** | IF | 0.15 | 0.161 | M |
| **16** | C | 0.95 | 0.917 | S | **41** | IF | 0.20 | 0.206 | M |
| **17** | C | 0.14 | 0.139 | M | **42** | IF | 0.32 | 0.303 | S |
| **18** | C | 0.24 | 0.266 | S | **43** | C | 0.14 | 0.142 | M |
| **19** | C | 0.25 | 0.245 | S | **44** | IF | 0.16 | 0.158 | M |
| **20** | C | 0.10 | 0.093 | W | **45** | C | 0.19 | 0.188 | M |
| **21** | C | 0.16 | 0.147 | M | **46** | C | 0.12 | 0.135 | M |
| **22** | C | 0.08 | 0.079 | W | **47** | IF | 0.12 | 0.111 | M |
| **23** | IF | 0.15 | 0.16 | M | **48** | IF | 0.10 | 0.081 | W |
| **24** | IF | 0.05 | 0.052 | W | **49** | IF | 0.15 | 0.146 | M |
| **25** | C | 0.13 | 0.121 | M |  |  |  |  |  |
